# Supplementary material
Source: publisher site journal article supplement (https://www.dovepress.com/article/333432)
Supplement: Supplementary file 1 [file get_supplementary_file.php]

**Proteomics of *Streptococcus mutans* to Reveal the Antibiofilm Formation Mechanism of Ag/ZnO Nanocomposites with Light-emitting Diode Radiation**

Nan Jiang1, Shuaiwei Zhao1, Shilei Wang1, Zhong Lu1*

1 Key Laboratory for Green Chemical Process of Ministry of Education, School of Environmental Ecology and Biological Engineering, Wuhan Institute of Technology, Wuhan 430205, P. R. China

Correspondence: Zhong Lu

Wuhan Institute of Technology, Wuhan 430205, P. R. China

Tel +86-18062036269

Fax +86-027-67905262

Email zhonglu@wit.edu.cn

***Characterization of Ag/ZnO nanocomposite***

The Ag/ZnO nanocomposite has been fully characterized in our former study1. In brief, Ag/ZnO is rodlike with nanoscale at 300−500 nm, observed by a Hitachi S4800 scanning electron microscope (SEM) (V=5 eV) and a Philips Tecnai 20 transmission electron microscope (TEM) (V=200 kV) (**Figure S1A** and **B**). Furthermore, a Bruker axs D8 Discover X-ray diffraction (XRD) demonstrated that the spectra of this materials acted the same as the hexagonal wurtzite phase of ZnO (JCPDS 36-1451) with three additional peaks 2θ = 38.1°, 44.3°, and 64.4°, which belongs to the Ag pattern (JCPDS 04-0783) (**Figure S1C**). Finally, the percentage of Ag in Ag/ZnO nanocomposite was determined as 7.04%, using a Perkin Elmer IRIS Intrepid IIXSP inductively coupled plasma-atomic emission spectrometry (ICP-AES).


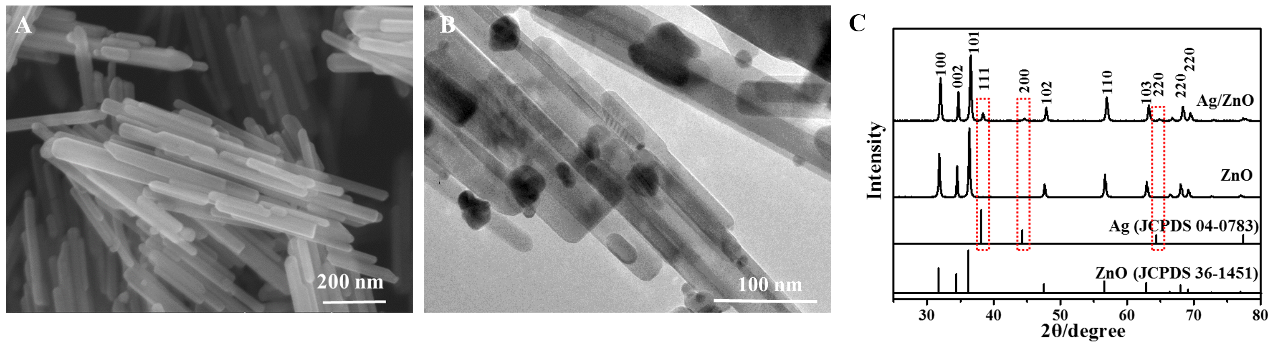


**Figure S1** The characterizations for Ag/ZnO nanocomposite.

**Notes:** (A) SEM images, (B) TEM images, and (C) XRD patterns. This Figure is from Reference 1 with the permission of Springer Nature.

**Abbreviations:** SEM, scanning electron microscope; TEM, transmission electron microscope; XRD, X-ray diffraction.


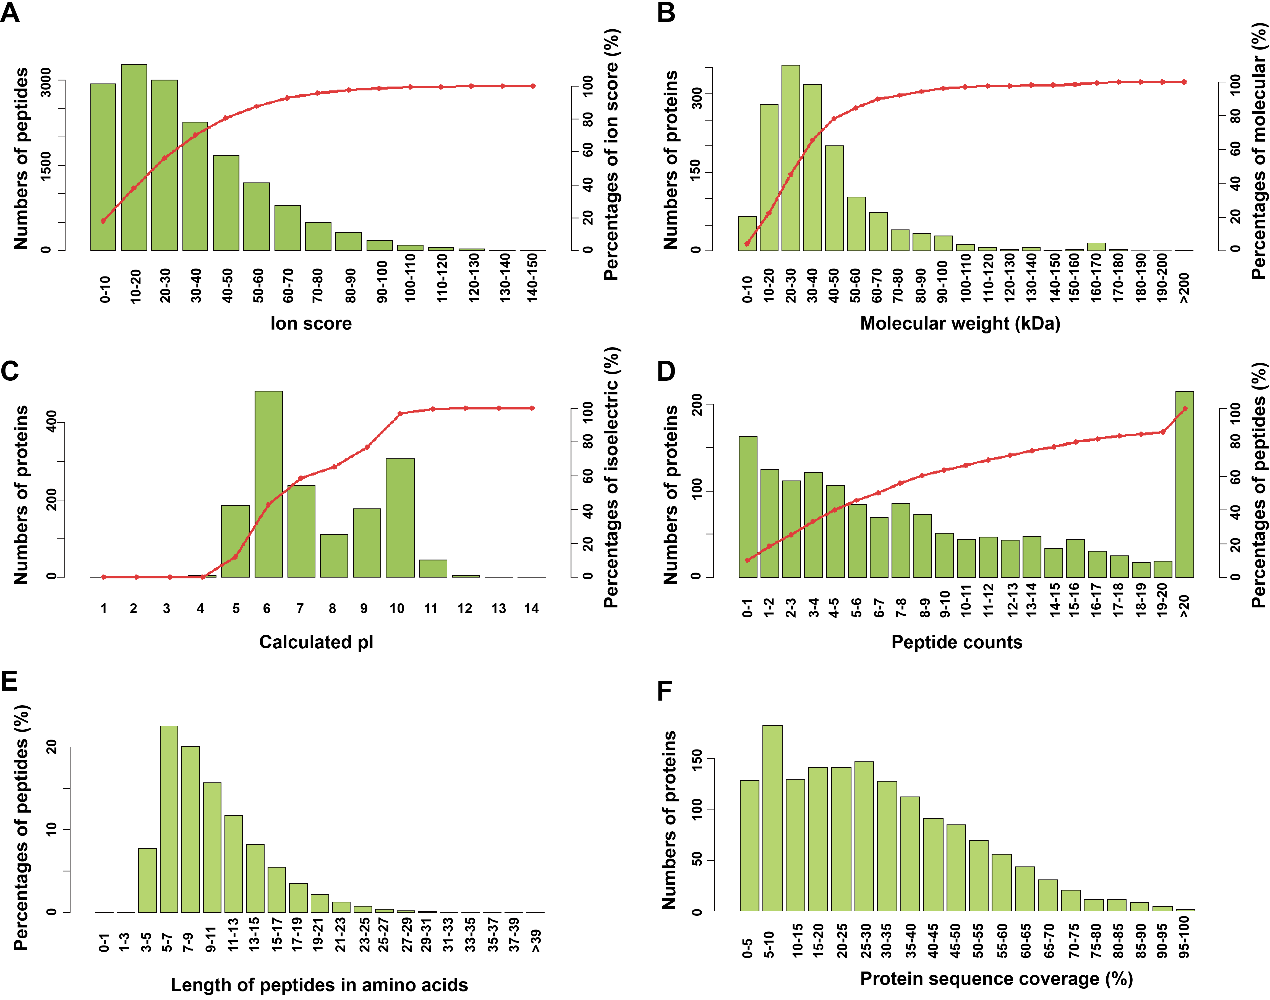


**Figure S2** Quantitative analysis of protein mass spectrometry by using MASCOT.

**Notes:** (A) ion score distribution, (B) molecular weight distribution, (C)isoelectric point (pI) distribution, (D) peptide count distribution, (E) peptide length distribution, and (F) protein sequence coverage distribution.

**Abbreviations:** pI, isoelectric point.

**Table S1** The identification list for proteins with the most 55 differential expression levels after synergistic therapy (fold change>1.2 and *p*<0.05)

| **Accession** | **Protein name** | **Gene name** | **Fold change** | **Reference** |
| --- | --- | --- | --- | --- |
| A0A0A8K7X7 | CRISPR-associated endonuclease Cas9 | *cas9* | 0.07 |  |
| A0A0E2EKL2 | Multiple promoter invertase | *mpi* | 0.26 |  |
| A0A0E2ER88 | Elongation factor Ts | *tsf* | 0.30 | 2 |
| A0A0E2EG41 | DNA polymerase III subunit  alpha | *SMU29_09019* | 0.39 |  |
| A0A0E2EP90 | 50S ribosomal protein L33 | *rpmG* | 0.51 |  |
| Q5TLL6 | Modifying enzyme for proSmb | *smbM1* | 0.53 |  |
| Q8DSM3 | Uncharacterized protein | *SMU_1755c* | 0.54 |  |
| A0A0E2EPZ2 | Uncharacterized protein | *SMU82_06704* | 0.57 |  |
| O70055 | D-alanine--  poly(phosphoribitol) ligase | *dltC* | 0.58 | 3 |
| A0A0E2EK19 | Uncharacterized protein |  | 0.58 |  |
| A0A0E2EJT2 | Uncharacterized protein | *SMU29_02576* | 0.64 |  |
| A0A0E2ENH3 | Putative membrane protein | *SMU82_06314* | 0.66 |  |
| A0A0E2ERU3 | Glucan-binding protein A, GbpA | *SMU82_00485* | 0.68 |  |
| Q8DTU7 | Uncharacterized protein | *SMU_1226c* | 0.68 |  |
| A0A0E2EQE3 | Putative transcriptional  regulator | *SMU82_03716* | 0.68 | 4 |
| A0A0E2ES33 | Uncharacterized protein | *SMU82_02931* | 0.69 |  |
| A0A0E2EIJ1 | Putative Zn-dependent  protease | *SMU29_04639* | 0.69 |  |
| A0A0E2ER74 | Ribosomal RNA small subunit methyltransferase E | *SMU82_04443* | 0.70 |  |
| A0A0E2EMR7 | Putative ferredoxin (4Fe-4S) | *SMU82_07571* | 0.71 |  |
| A0A0E2EM32 | Glucosyltransferase-SI  (Fragment) | *SMU82_09792* | 0.71 | 5, 6 |
| A0A0E2ENF9 | Acyl carrier protein | *acpP*(Rename as *acpP-1*) | 0.72 |  |
| A0A0E2EQE2 | Acyl carrier protein | *acpP*(Rename as *acpP-2*) | 0.72 |  |
| A0A0E2ERD4 | Putative transcription regulator | *SMU82_01250* | 0.74 | 4 |
| Q8DV86 | Uncharacterized protein | *SMU_618* | 0.75 | 7 |
| M4JBQ8 | Glucosyltransferase-SI | *gtfC* | 0.75 | 5, 6 |
| A0A0E2EK69 | Lactoylglutathione lyase | *SMU29_02221* | 0.76 |  |
| A0A0E2EQ70 | Putative thioredoxin H1 | *SMU82_03156* | 0.76 |  |
| A0A0E2ENK6 | Putative PTS system, sorbitol-  specific enzyme IIA | *SMU82_07124* | 0.77 | 4, 8 |
| A0A0E2EMS0 | Putative methylated-DNA-protein-cysteine | *SMU82_08385* | 0.79 |  |
| A0A0E2EHM6 | Uncharacterized protein | *SMU29_06449* | 0.79 |  |
| Q8DT80 | Uncharacterized protein | *SMU_1486c* | 0.79 |  |
| A0A0E2ENG4 | Putative peptidoglycan  hydrolase | *SMU82_07344* | 0.80 |  |
| A0A0E2F2H0 | Uncharacterized protein | *SMU82_01447* | 0.81 |  |
| A0A0D6A7T5 | Sortase | *srtA* | 0.81 | 8 |
| Q8DUW9 | Glucan-binding protein D with lipase activity BglB-like | *gbpD* | 0.81 | 9, 10 |
| Q8DW34 | Uncharacterized protein | *SMU_243* | 0.82 |  |
| A0A0E2EQC0 | tRNA-specific adenosine  deaminase | *tadA* | 0.82 |  |
| A0A0E2ERQ6 | Uncharacterized protein | *SMU82_00710* | 0.82 |  |
| A0A0E2EGD9 | Putative Mg2+/citrate  transporter | *SMU29_08849* | 0.83 |  |
| Q8DSL9 | Uncharacterized protein | *SMU_1761c* | 0.83 |  |
| Q93D88 | MepR | *mepR* | 0.83 |  |
| A0A0E2EQ31 | Levansucrase | *SMU82_04583* | 0.83 | 11 |
| A0A0E2EI55 | Putative acetyltransferase | *SMU29_05419* | 0.83 | 4 |
| Q8DUG9 | 50S ribosomal protein L7/L12 | *rplL* | 1.21 | 4 |
| A0A0E2EM53 | Uncharacterized protein | *SMU29_02081* | 1.22 |  |
| Q8DUX7 | Uncharacterized protein | *SMU_757* | 1.22 |  |
| Q8DVW8 | Ribonuclease M5 | *rnmV* | 1.23 |  |
| A0A0E2F065 | ATP/GTP hydrolase | *SMU82_05767* | 1.24 |  |
| A0A0A0R886 | PA | *--* | 1.25 | 12, 13 |
| A0A0E2ESP8 | Uncharacterized protein | *SMU82_00275* | 1.27 |  |
| A0A0A0RAT8 | PA | *--* | 1.30 | 12, 13 |
| Q54443 | Dextranase | *dexA* | 1.30 | 14, 15 |
| A0A0E2EIA8 | Putative hemolysin III | *SMU29_05049* | 1.34 |  |
| A0A0E2F0B5 | Glucan-binding protein C | *SMU82_05402* | 1.84 | 9, 10 |
| A0A0E2EI35 | Uncharacterized protein | *SMU29_07061* | 2.40 |  |

**Table S2** The GO terms for these differentially expressed proteins in Table S1.

|  | **Pathway ID** | **GO term** | **Protein Number** | **The protein showed by the gene name** |
| --- | --- | --- | --- | --- |
| **Biological Process** | GO:0002376 | immune system process | 2 | *SMU_1755c, cas9* |
| GO:0051179 | localization | 4 | *SMU29_08849, acpP-2, acpP-1, SMU82_07124* |
| GO:0044699 | single-organism process | 11 | *SMU82_03156, gtfC, SMU_1486c, SMU82_09792, SMU29_08849, SMU82_04583, dltC, acpP-1, acpP-2, SMU29_02221, SMU82_07124* |
| GO:0050896 | response to stimulus | 3 | *SMU_1755c, SMU82_08385, cas9* |
| GO:0065007 | biological regulation | 6 | *SMU82_03156, SMU82_03716, dltC, mepR, tsf, SMU82_01250* |
| GO:0050789 | regulation of biological process | 6 | *SMU82_03156, SMU82_03716, dltC, tsf, mepR, SMU82_01250,* |
| GO:0071840 | cellular component organization or biogenesis | 7 | *SMU_1755c, SMU82_04443, dltC, cas9, rnmV, rplL, rpmG* |
| GO:0032502 | developmental process | 1 | *dltC* |
| GO:0009987 | cellular process | 26 | *SMU82_03156, SMU82_09792, SMU82_04583, SMU82_04443, mpi, rplL, mepR, SMU82_03716, tadA, acpP-2, cas9, SMU29_05049, rpmG, gtfC, dltC, SMU29_05419, SMU82_08385* |
| GO:0008152 | metabolic process | 28 | *SMU82_03156, SMU82_09792, SMU82_04583, dltC, acpP-1, rpmG, SMU82_04443, mpi, mepR, rplL, SMU29_04639, SMU82_02931, SMU82_03716, tadA, acpP-2, cas9, SMU29_05419, SMU82_08385, gtfC, SMU_1486c, SMU82_05767, SMU29_02221, tsf, SMU_1755c, rnmV, dexA, SMU82_01250, SMU29_09019* |
| **Molecular Function** | GO:0005215 | transporter activity | 2 | *SMU29_08849, SMU82_07124* |
| GO:0036370 | D-alanyl carrier activity | 1 | *dltC* |
| GO:0003824 | catalytic activity | 24 | *SMU82_03156, SMU82_09792, SMU82_04443, SMU82_04583, dltC, dexA, mpi, SMU29_04639, SMU82_02931, SMU82_01447, SMU82_07344, cas9, gbpD, tadA, SMU29_05419, SMU82_08385, gtfC, SMU_1486c, SMU29_02221, SMU82_05767, SMU82_07124, SMU_1755c, rnmV, SMU29_09019* |
| GO:0005198 | structural molecule activity | 2 | *rplL, rpmG* |
| GO:0005488 | binding | 16 | *dltC, acpP-1, rnmV, SMU29_02221, SMU29_04639, SMU82_02931, tsf, mepR, SMU_1755c, SMU82_03716, tadA, cas9, acpP-2, SMU82_01250, SMU29_09019,*  *mpi* |
| GO:0001071 | nucleic acid binding transcription factor activity | 1 | *mepR* |
| **Cellular Component** | GO:0032991 | macromolecular complex | 6 | *rplL, tsf, mepR, SMU29_09019, rpmG, SMU82_07124* |
| GO:0016020 | membrane | 15 | *SMU29_02081, SMU29_07061, SMU82_04583, SMU29_04639,* A0A0A0RAT8*, SMU82_06314, SMU82_07124, SMU82_00275, SMU29_08849, srtA, SMU_243,* A0A0A0R886*, SMU29_05049, gbpD, SMU_618* |
| GO:0044425 | membrane part | 14 | *SMU29_02081, SMU29_07061, SMU82_04583, SMU29_04639,* A0A0A0RAT8*, SMU82_06314, SMU82_07124, SMU82_00275, SMU29_08849, srtA, SMU_243,* A0A0A0R886*, SMU29_05049, SMU_618* |
| GO:0005576 | extracellular region | 6 | *gtfC, gbpD, dexA SMU82_04583, SMU29_04639,* A0A0A0RAT8*,* |
| GO:0043226 | organelle | 3 | *rplL, tsf, rpmG* |
| GO:0044421 | extracellular region part | 1 | *SMU29_04639* |
| GO:0005623 | cell | 15 | *SMU29_07061, SMU82_03156, SMU82_04443, rplL, tsf, mepR,* A0A0A0RAT8*, SMU82_07124, acpP-2, acpP-1,* A0A0A0R886*, rnmV, dexA, rpmG, SMU29_09019* |
| GO:0044464 | cell part | 14 | *SMU29_07061, SMU82_04443, rplL, tsf, mepR,* A0A0A0RAT8*, SMU82_07124, acpP-2, acpP-1,* A0A0A0R886*, rnmV, dexA, rpmG, SMU29_09019* |

**Abbreviations:** GO, gene ontology.

**Table S3** The top 20 enriched GO terms

|  | **Pathway ID** | **GO term** | ***p*-value** | **R- factors** | **The protein showed by the gene name** |
| --- | --- | --- | --- | --- | --- |
| **Biological Process** | GO:0002252 | immune system process | 0.0071 | 0.5 | *SMU_1755c, cas9* |
| GO:0051607 | defense response to virus | 0.0071 | 0.5 | *SMU_1755c, cas9* |
| GO:0043570 | maintenance of DNA repeat elements | 0.0071 | 0.5 | *SMU_1755c, cas9* |
| GO:0009615 | response to virus | 0.0071 | 0.5 | *SMU_1755c, cas9* |
| GO:0043571 | maintenance of CRISPR repeat elements | 0.0071 | 0.5 | *SMU_1755c, cas9* |
| GO:0002376 | immune system process | 0.012 | 0.4 | *SMU_1755c, cas9* |
| GO:0071840 | cellular component organization or biogenesis | 0.012 | 0.4 | *SMU_1755c, cas9* |
| GO:0032502 | developmental process | 0.012 | 0.4 | *SMU_1755c, cas9* |
| GO:0009987 | cellular process | 0.012 | 0.4 | *SMU_1755c, cas9* |
| GO:0008152 | metabolic process | 0.012 | 0.4 | *SMU_1755c, cas9* |
| GO:0044260 | cellular macromolecule metabolic process | 0.021 | 0.053 | *SMU82_08385, gtfC, SMU82_09792, dltC, SMU82_04443, SMU82_04583, SMU82_05767, mpi, rplL, tsf, mepR, SMU_1755c, SMU82_03716, acpP-2, tadA, cas9, acpP-1, rnmV, SMU82_01250, SMU29_09019, rpmG, SMU29_05419* |
| GO:0043170 | macromolecule metabolic process | 0.030 | 0.051 | *SMU82_08385, gtfC, SMU82_09792, dltC, SMU82_04443, SMU82_04583, SMU82_05767, mpi, rplL, SMU29_04639, tsf, mepR, SMU_1755c, SMU82_03716, acpP-2, tadA, cas9, acpP-1, rnmV, SMU82_01250, SMU29_09019, rpmG, SMU29_05419* |
| **Molecular Function** | GO:0051192 | prosthetic group binding | 0.0012 | 1 | *acpP-2, acpP-1* |
| GO:0044620 | ACP phosphopantetheine attachment site binding | 0.0012 | 1 | *acpP-2, acpP-1* |
| GO:0000036 | ACP phosphopantetheine attachment site binding involved in fatty acid biosynthetic process | 0.0012 | 1 | *acpP-2, acpP-1* |
| GO:0031177 | phosphopantetheine binding | 0.071 | 0.5 | *acpP-1, SMU82_02931* |
| GO:0072341 | modified amino acid binding | 0.012 | 0.4 | *acpP-1, SMU82_02931* |
| **Cellular Component** | GO:0005576 | extracellular region | 1.38E-5 | 0.35 | *gtfC, gbpD, SMU82_04583, SMU29_04639,* A0A0A0RAT8*, dexA* |
| GO:0016020 | external encapsulating structure | 0.00025 | 0.4 | *SMU29_07061,* A0A0A0R886*,* A0A0A0RAT8*, dexA* |
| GO:0005576 | extracellular region | 0.00025 | 0.4 | *SMU29_07061,* A0A0A0R886*,* A0A0A0RAT8*, dexA* |

**Abbreviations:** GO, gene ontology.

**References**

1. Wang S, Wu J, Yang H, et al. Antibacterial activity and mechanism of Ag/ZnO nanocomposite against anaerobic oral pathogen Streptococcus mutans. *J Mater Sci-Mater M*. 2017;28(1):23.

2. Yi L, Wang Y, Ma Z, et al. Biofilm formation of Streptococcus equi ssp. zooepidemicus and comparative proteomic analysis of biofilm and planktonic cells. *Curr Microbiol*. 2014;69(3):227–233.

3. Nilsson M, Rybtke M, Givskov M, et al. The dlt genes play a role in antimicrobial tolerance of Streptococcus mutans biofilms. *Int J Antimicrob Ag*. 2016;48(3):298–304.

4. Shemesh M, Tam A, Steinberg D. Differential gene expression profiling of Streptococcus mutans cultured under biofilm and planktonic conditions. *Microbiology*.2007;153(5):1307–1317.

5. Bowen W, Koo H. Biology of Streptococcus mutans-derived glucosyltransferases: role in extracellular matrix formation of cariogenic biofilms. *Caries Res*.2011;45(1):69–86.

6. Scharnow AM, Solinski AE, Wuest WM. Targeting S. mutans biofilms: a perspective on preventing dental caries. *Med Chem Comm*. 2019;10(7):1057–1067.

7. Shemesh M, Tam A, Kott-Gutkowski M, et al. DNA-microarrays identification of Streptococcus mutans genes associated with biofilm thickness. *BMC Microbiol*.2008;8(1):236.

8. Hu P, Huang P, Chen MW. Curcumin reduces Streptococcus mutans biofilm formation by inhibiting sortase A activity. *Arch Oral Biol*. 2013;58(10):1343–1348.

9. Lynch DJ, Fountain TL, Mazurkiewicz JE, et al. Glucan-binding proteins are essential for shaping Streptococcus mutans biofilm architecture. *FEMS Microbiol Lett*.2007**;**268(2):158–165.

10. Matsumoto-Nakano M. Role of Streptococcus mutans surface proteins for biofilm formation. *Jpn Dent Sci Rev*.2018;54(1):22–29.

11. Xu W, Ni D, Zhang W, et al. Recent advances in levansucrase and inulosucrase: evolution, characteristics, and application. *Crit Rev Food Sci*. 2019;59(22):3630–3647.

12. Rivera-Quiroga RE, Cardona N, Padilla L, et al. In silico selection and in vitro evaluation of new molecules that inhibit the adhesion of Streptococcus mutants through antigen I/II. *Int J Mol Sci*. 2021;22(1):377.

13. Lapirattanakul J, Nomura R, Matsumoto-Nakano M, et al. Variation of expression defects in cell surface 190-kDa protein antigen of Streptococcus mutans. *Int J Med Microbiol*. 2015;305(3):383–391.

14. Yang Y, Mao M, Lei L, et al. Regulation of water-soluble glucan synthesis by the Streptococcus mutans dexA gene effects biofilm aggregation and cariogenic pathogenicity. *Mol Oral Microbiol*. 2019;34(2):51–63.

15. Ebaya MMA, El-Mowafy M, Adel El-Sokkary MM, et al. Purification, characterization, and biocatalytic and antibiofilm activity of a novel dextranase from Talaromyces sp. *Int J Microbiol*. 2020;2020(9):9198048.
